# Supplementary material for: Identification of a FOXP3+CD3+CD56+ population with immunosuppressive function in cancer tissues of human hepatocellular carcinoma
Source: PubMed Central journal article supplement (PMC4594002; doi:10.1038/srep14757), 2015-10-06
Supplement: srep14757-s1.pdf [file srep14757-s1.pdf]

Identification of a FOXP3<sup>+</sup>CD3<sup>+</sup>CD56<sup>+</sup> population with immunosuppressive function in cancer tissues of human hepatocellular carcinoma

Xiaofeng Li, Jirun Peng, Yanli Pang, Sen Yu, Xin Yu, Pengcheng Chen, Wenzhen Wang, Wenling Han, Jun Zhang, Yanhui Yin, Yu Zhang

Table S1 Characteristics of 34 patients in survival analysis

| Patient No. | Gender | Age (year) | AFP (ng/ml) | TNM (stage) | Survival time (month) | Disease free time (month) | Relative levels of specific subsets                           |                                                            |
|-------------|--------|------------|-------------|-------------|-----------------------|---------------------------|---------------------------------------------------------------|------------------------------------------------------------|
|             |        |            |             |             |                       |                           | % of FOXP3 <sup>+</sup> in CD3 <sup>+</sup> CD56 <sup>+</sup> | % of CD3 <sup>+</sup> CD56 <sup>+</sup> FOXP3 <sup>+</sup> |
| 1           | male   | 73         | 1210        | II          | 4.5                   | 4.5                       | high                                                          | high                                                       |
| 2           | male   | 64         | 4.21        | I           | 12.5                  | 12.5                      | high                                                          | low                                                        |
| 3           | male   | 47         | 3.29        | III         | >24                   | 11.5                      | low                                                           | high                                                       |
| 4           | male   | 77         | 4.36        | II          | >24                   | 12                        | low                                                           | low                                                        |
| 5           | male   | 70         | 9           | II          | 48                    | 39                        | low                                                           | low                                                        |
| 6           | male   | 57         | 12          | II          | 60                    | 48                        | low                                                           | low                                                        |
| 7           | male   | 65         | 1210        | II          | 49                    | 40                        | low                                                           | low                                                        |
| 8           | female | 54         | 8.58        | II          | >72                   | 48                        | low                                                           | low                                                        |
| 9           | male   | 70         | 16.52       | III         | 19                    | 10                        | low                                                           | high                                                       |
| 10          | female | 58         | 3.03        | II          | 1.5                   | 1.5                       | low                                                           | low                                                        |
| 11          | female | 64         | 1210        | II          | 4                     | 2                         | high                                                          | high                                                       |
| 12          | male   | 54         | 1210        | II          | 15                    | 6                         | high                                                          | high                                                       |
| 13          | female | 57         | 362.9       | IV          | 40                    | 5                         | high                                                          | low                                                        |
| 14          | male   | 66         | 69.35       | I           | 29                    | 6                         | low                                                           | low                                                        |
| 15          | female | 65         | 1210        | III         | 1.5                   | 1.5                       | high                                                          | high                                                       |
| 16          | male   | 80         | 270.5       | II          | >24                   | 24                        | high                                                          | high                                                       |
| 17          | male   | 47         | 1210        | IV          | 3                     | 3                         | high                                                          | high                                                       |
| 18          | male   | 39         | 1210        | II          | 4                     | 3.5                       | low                                                           | high                                                       |
| 19          | male   | 36         | 1210        | II          | 2.5                   | 2.5                       | high                                                          | high                                                       |
| 20          | female | 77         | 1.89        | III         | 0.5                   | 0.5                       | low                                                           | low                                                        |
| 21          | male   | 57         | 139.5       | IV          | 0.5                   | 0.5                       | high                                                          | high                                                       |
| 22          | male   | 69         | 126         | I           | 6                     | 3.5                       | low                                                           | low                                                        |
| 23          | male   | 37         | 7.55        | II          | 3.5                   | 3.5                       | low                                                           | low                                                        |
| 24          | male   | 84         | 1210        | II          | 4                     | 4                         | high                                                          | high                                                       |
| 25          | male   | 63         | 1210        | IV          | 1.5                   | 1.5                       | high                                                          | high                                                       |
| 26          | male   | 52         | 1210        | I           | >20                   | 2                         | high                                                          | high                                                       |
| 27          | female | 46         | 40.54       | IV          | >16                   | >16                       | low                                                           | high                                                       |
| 28          | male   | 65         | 36.5        | I           | 48                    | 15                        | high                                                          | high                                                       |
| 29          | female | 75         | 3.99        | I           | >19                   | >19                       | high                                                          | low                                                        |
| 30          | male   | 41         | 1210        | IV          | >13                   | >13                       | low                                                           | low                                                        |
| 31          | female | 57         | 1.51        | II          | >12                   | 8                         | low                                                           | low                                                        |
| 32          | male   | 49         | 52.28       | II          | >11                   | >11                       | high                                                          | high                                                       |
| 33          | female | 65         | 2.04        | II          | >14                   | >14                       | low                                                           | low                                                        |
| 34          | male   | 55         | 15.84       | IV          | 2                     | 2                         | high                                                          | high                                                       |
